# Supplementary material for: Ultra High-plex Spatial Proteogenomic Investigation of Giant Cell Glioblastoma Multiforme Immune Infiltrates Reveals Distinct Protein and RNA Expression Profiles
Source: PubMed Central journal article supplement (PMC10155752; doi:10.1158/2767-9764.crc-22-0396), 2023-05-03
Supplement: crc-22-0396-s01.pdf [file crc-22-0396-s01.pdf]

## Supplementary Tables

**Supplementary Table S1:** A list of materials and reagents that are recommended for the GeoMx DSP assays that are not supplied by NanoString.

| Reagent/Material                                                                                                 | Source/Part Number                                  |
|------------------------------------------------------------------------------------------------------------------|-----------------------------------------------------|
| 10% neutral buffered formalin (NBF)                                                                              | EMS Diasum, 15740-04                                |
| 100% deionized formamide                                                                                         | VWR, VWRV0606                                       |
| 100% ethanol (EtOH): ACS grade or better                                                                         | Various                                             |
| 10X citrate buffer pH 6                                                                                          | Sigma-Aldrich, C9999-1000ML                         |
| 10X phosphate buffered saline pH 7.4 (PBS)                                                                       | Invitrogen, 00652158                                |
| 10X TBS with tween 20 (TBS-T)                                                                                    | Cell Signaling Technologies, 9997S                  |
| 10X tris buffered saline (TBS)                                                                                   | Cell Signaling Technologies, 12498S                 |
| 16% paraformaldehyde (PFA)                                                                                       | 16% stock, 28908                                    |
| 1X phosphate buffered saline pH 7.4 (PBS)                                                                        | ThermoFisher, 10010031                              |
| 20X SSC (DNase, RNase free)                                                                                      | Sigma-Aldrich, S6639                                |
| BOND Dewax Solution, 1 L                                                                                         | Leica Biosystems, AR9222                            |
| BOND Epitope Retrieval 1, 1 L                                                                                    | Leica Biosystems, AR9961                            |
| BOND Epitope Retrieval 2, 1 L                                                                                    | Leica Biosystems, AR9640                            |
| BOND Wash Solution 10X Concentrate, 1 L                                                                          | Leica Biosystems, AR9590                            |
| CitriSolv                                                                                                        | Fisher Scientific, 04-355-121                       |
| DEPC-treated water                                                                                               | ThermoFisher, AM9922                                |
| Glycine                                                                                                          | Sigma-Aldrich, G7126                                |
| Proteinase K                                                                                                     | Ambion, AM2546                                      |
| Tris base                                                                                                        | Sigma-Aldrich, 10708976001                          |
| HybriSlip hybridization covers (22 mm x 40 mm x 0.25 mm)                                                         | Grace Bio-Labs, 714022                              |
| RNase Away                                                                                                       | Thermofisher, 7003PK                                |
| Dextran sulfate                                                                                                  | Sigma, 67578                                        |
| BSA                                                                                                              | VWR, 97061-420                                      |
| Deoxyribonucleic acid, single stranded from salmon testes (denatured by heating at 95°C for 10 min prior to use) | Sigma, D7656                                        |
| Agencourt AMPure XP                                                                                              | Beckman Coulter, A63880                             |
| Elution buffer (Tris-HCl 10 mM with 0.05% Tween-20, pH 8.0) *                                                    | Teknova, T1485                                      |
| Bioanalyzer DNA High Sensitivity Kit                                                                             | Agilent, 5067-4626                                  |
| Qubit dsDNA HS Assay Kit                                                                                         | Q32854                                              |
| GFAP antibody (GA-5) Alexa Fluor® 647                                                                            | Novus Biologicals, NPB2-33184AF647, RRID:AB_2935766 |
| nCounter Master Kit (Maxor FLEX Systems) Reagents and Cartridges                                                 | NAA-AKIT-012                                        |
| BOND Research Detection System (includes 6x 30 mL Open Containers)                                               | Leica Biosystems, DS9455                            |
| BOND Titration Kit (includes 50 inserts)                                                                         | Leica Biosystems, OPT9049                           |
| BOND Universal Covertiles                                                                                        | Leica Biosystems, S21.2001                          |
| BOND Open Containers 30 mL                                                                                       | Leica Biosystems, OP309700                          |

**Supplementary Table S2.** A list of NanoString supplied materials and reagents.

| Reagent/Material                                                        | Source/Item                                         |
|-------------------------------------------------------------------------|-----------------------------------------------------|
| GeoMx Solid Tumor TME Morphology Kit Human Protein Compatible           | Nanostring Technologies, GMX-PRO-MORP-HHST-12       |
| GeoMx Solid Tumor TME Morphology Kit Mouse RNA FFPE Compatible          | Nanostring Technologies, GMX-RNA-MORPH-MST-FFPE12   |
| GeoMx Immune Cell Profiling Panel Human Protein Core for nCounter       | Nanostring Technologies, GMX-PROCO-NCT-HICP-12      |
| GeoMx Immune Activation Status Panel Human Protein Module for nCounter  | Nanostring Technologies, GMX-PROMOD-NCT-HICT(AS)-12 |
| GeoMx Immune Cell Typing Panel Human Protein Module for nCounter        | Nanostring Technologies, GMX-PROMOD-NCT-HICT-12     |
| GeoMx IO Drug Target Panel Human Protein Module for nCounter            | Nanostring Technologies, GMX-PROMOD-NCT-HIODT-12    |
| GeoMx Human Protein Core for NGS                                        | Nanostring Technologies, GMX-PROCO-NGS-HCORE-12     |
| GeoMx Immune Cell Typing Panel Human Protein Module for NGS             | Nanostring Technologies, GMX-PROMOD-NGS-HICT-12     |
| GeoMx IO Drug Target Panel Human Protein Module for NGS                 | Nanostring Technologies, GMX-PROMOD-NGS-HIODT-12    |
| GeoMx Immune Activation Status Panel Human Protein Module for NGS       | Nanostring Technologies, GMX-PROMOD-NGS-HIAS-12     |
| GeoMx Pan-Tumor Panel Human Protein Module for NGS                      | Nanostring Technologies, GMX-PROMOD-NGS-HPT-12      |
| GeoMx Myeloid Panel Human Protein Module for NGS                        | Nanostring Technologies, GMX-PROMOD-NGS-HMY-12      |
| GeoMx MAPK Signaling Panel Human Protein Module for NGS                 | Nanostring Technologies, GMX-PROMOD-NGS-HMAPK-12    |
| GeoMx PI3K/AKT Signaling Panel Human Protein Module for NGS             | Nanostring Technologies, GMX-PROMOD-NGS-HPI3K-12    |
| GeoMx Neural Cell Typing Panel Human Protein Module for NGS             | Nanostring Technologies, GMX-PROMOD-NGS-HNCT-12     |
| GeoMx Alzheimer's Pathology Panel Human Protein Module for NGS          | Nanostring Technologies, GMX-PROMOD-NGS-HADP-12     |
| GeoMx Parkinson's Pathology Panel Human Protein Module for NGS          | Nanostring Technologies, GMX-PROMOD-NGS-HPDP-12     |
| GeoMx Alzheimer's Pathology Extended Panel Human Protein Module for NGS | Nanostring Technologies, GMX-PROMOD-NGS-HADEP-12    |
| GeoMx Cell Death Panel Human Protein Module for NGS                     | Nanostring Technologies, GMX-PROMOD-NGS-HCD-12      |
| GeoMx Glial Cell Subtyping Panel Human Protein Module for NGS           | Nanostring Technologies, GMX-PROMOD-NGS-HGCS-12     |
| GeoMx Autophagy Panel Human Protein Module for NGS                      | Nanostring Technologies, GMX-PROMOD-NGS-HA-12       |
| GeoMx Mouse Protein Core for NGS                                        | Nanostring Technologies, GMX-PROCO-NGS-MCORE-12     |
| GeoMx Immune Cell Typing Panel Mouse Protein Module for NGS             | Nanostring Technologies, GMX-PROMOD-NGS-MICT-12     |
| GeoMx IO Drug Target Panel Mouse Protein Module for NGS                 | Nanostring Technologies, GMX-PROMOD-NGS-MIODT-12    |
| GeoMx Immune Activation Status Panel Mouse Protein Module for NGS       | Nanostring Technologies, GMX-PROMOD-NGS-MIAS-12     |
| GeoMx Pan-Tumor Panel Mouse Protein Module for NGS                      | Nanostring Technologies, GMX-PROMOD-NGS-MPT-12      |
| GeoMx Myeloid Panel Mouse Protein Module for NGS                        | Nanostring Technologies, GMX-PROMOD-NGS-MMY-12      |
| GeoMx MAPK Signaling Panel Mouse Protein Module for NGS                 | Nanostring Technologies, GMX-PROMOD-NGS-MMAPK-12    |
| GeoMx PI3K/AKT Signaling Panel Mouse Protein Module for NGS             | Nanostring Technologies, GMX-PROMOD-NGS-MPI3K-12    |
| GeoMx Neural Cell Typing Panel Mouse Protein Module for NGS             | Nanostring Technologies, GMX-PROMOD-NGS-MNCT-12     |
| GeoMx Alzheimer's Pathology Panel Mouse Protein Module for NGS          | Nanostring Technologies, GMX-PROMOD-NGS-MADP-12     |
| GeoMx Parkinson's Pathology Panel Mouse Protein Module for NGS          | Nanostring Technologies, GMX-PROMOD-NGS-MPDP-12     |
| GeoMx Alzheimer's Pathology Extended Panel Mouse Protein Module for NGS | Nanostring Technologies, GMX-PROMOD-NGS-MADEP-12    |
| GeoMx Cell Death Panel Mouse Protein Module for NGS                     | Nanostring Technologies, GMX-PROMOD-NGS-MCD-12      |
| GeoMx Glial Cell Subtyping Panel Mouse Protein Module for NGS           | Nanostring Technologies, GMX-PROMOD-NGS-MGCS-12     |
| GeoMx Autophagy Panel Mouse Protein Module for NGS                      | Nanostring Technologies, GMX-PROMOD-NGS-MA-12       |
| GeoMx Protein Slide Prep Kit for FFPE                                   | Nanostring Technologies, GMX -PREP-PRO-FFPE-12      |
| GeoMx Hyb Code Pack Protein                                             | Nanostring Technologies, GMX-PRO-HYB-96             |
| GeoMx DSP Collection Plate                                              | Nanostring Technologies, GMX-DSP-COLL-PLT-4         |
| GeoMx DSP Instrument Buffer Kit                                         | Nanostring Technologies, GMX-DSP-BUFF-KIT           |
| GeoMx Seq Code Pack                                                     | Nanostring Technologies, GMX-NGS-SEQ-AB             |
| GeoMx Human Whole Transcriptome Atlas Human RNA for Illumina Systems    | Nanostring Technologies, GMX-RNA-NGS-HuWTA-4        |
| GeoMx RNA Slide Prep Kit for FFPE                                       | Nanostring Technologies, GMX-PREP-RNA-FFPE-12       |
| GeoMx Cancer Transcriptome Atlas Human RNA for Illumina Systems         | Nanostring Technologies, GMX-RNA-NGS-CTA-4          |
| GeoMx Mouse Whole Transcriptome Atlas Mouse RNA for Illumina Systems    | Nanostring Technologies, GMX-RNA-NGS-MsWTA-4        |

**Supplementary Table S3: A list of Human protein targets by module.**

| NGS Human Panel                            | Target                                 | NGS Human Panel                                      | Target                         |
|--------------------------------------------|----------------------------------------|------------------------------------------------------|--------------------------------|
| GeoMx Human Immune Activation Status Panel | CD127                                  | GeoMx Human NGS Alzheimer's Extended Pathology Panel | ADAM10                         |
|                                            | CD25                                   |                                                      | BACE1                          |
|                                            | CD27                                   |                                                      | IDE                            |
|                                            | CD44                                   |                                                      | Nephrilysin                    |
|                                            | CD45RO                                 |                                                      | Neurogranin                    |
|                                            | CD80                                   |                                                      | PSEN1                          |
|                                            | ICOS                                   |                                                      | p-Tau (S199)                   |
|                                            | PD-1                                   |                                                      | p-Tau (S396)                   |
| GeoMx Human NGS Cell Death Panel           | PD-L1                                  | GeoMx Human NGS Alzheimer's Pathology Panel          | p-Tau (T214)                   |
|                                            | PD-L2                                  |                                                      | p-Tau (T231)                   |
|                                            | BAD                                    |                                                      | Amyloid Precursor Protein      |
|                                            | BCL6                                   |                                                      | Amyloid-Beta 1-40              |
|                                            | BCLXL                                  |                                                      | Amyloid-Beta 1-42              |
|                                            | BIM                                    |                                                      | APOE                           |
|                                            | CD95/Fas                               |                                                      | P2RX7                          |
|                                            | Cleaved Caspase 9                      |                                                      | Phospho-Tau (S404)             |
| GeoMx Human NGS Immune Cell Typing Panel   | GZMA                                   | GeoMx Human NGS Glial Cell Subtyping Panel           | Phospho-Tdp-43 (S409/S410)     |
|                                            | NF-1 (Neurofibromin-1)                 |                                                      | Tau                            |
|                                            | p53                                    |                                                      | Tdp-43                         |
|                                            | PARP                                   |                                                      | Ubiquitin                      |
|                                            | CD20                                   |                                                      | ATG12                          |
|                                            | CD3                                    |                                                      | ATG5                           |
|                                            | CD34                                   |                                                      | BAG3                           |
|                                            | CD4                                    |                                                      | GAB                            |
| GeoMx Human NGS MAPK Signaling Panel       | CD56                                   | GeoMx Human NGS Neural Cell Typing Panel             | HSC70                          |
|                                            | CD66b                                  |                                                      | LAMP2A                         |
|                                            | CD8                                    |                                                      | LC3B                           |
|                                            | Fibronectin                            |                                                      | P62                            |
|                                            | FOXP3                                  |                                                      | TFEB                           |
|                                            | GZMB                                   |                                                      | VPS35                          |
|                                            | 4-1BB                                  |                                                      | C4B                            |
|                                            | B7-H3                                  |                                                      | CD9                            |
| GeoMx Human NGS Myeloid Panel              | CTLA4                                  | GeoMx Human NGS Parkinson's Pathology Panel          | Clec7a                         |
|                                            | GITR                                   |                                                      | CSF1R                          |
|                                            | IDO1                                   |                                                      | Ctsd                           |
|                                            | LAG3                                   |                                                      | Emp1                           |
|                                            | OX40L                                  |                                                      | GPNMB                          |
|                                            | STING                                  |                                                      | Mertk                          |
|                                            | Tim-3                                  |                                                      | S100B                          |
|                                            | VISTA                                  |                                                      | VIM                            |
| GeoMx Human NGS Pan-Tumor Panel            | BRAF                                   | GeoMx Human NGS Core                                 | GFAP                           |
|                                            | EGFR                                   |                                                      | IBA1                           |
|                                            | JNK (phospho T183/Y185)                |                                                      | MAP2                           |
|                                            | MEK1 (phospho S217/S221)               |                                                      | Myelin basic protein           |
|                                            | P38 (phospho T180/Y182)                |                                                      | NeuN                           |
|                                            | p44/42 MAPK ERK1/2                     |                                                      | Neurofilament light            |
|                                            | p44/42 MAPK ERK1/2 (phospho T202/Y204) |                                                      | Olig2                          |
|                                            | P90RSK (phospho T359/S363)             |                                                      | P2ry12                         |
| GeoMx Human NGS PI3K/AKT Signaling Panel   | pan-RAS                                | GeoMx Human NGS Core                                 | Synaptophysin                  |
|                                            | ARG1                                   |                                                      | TMEM119                        |
|                                            | CD11b                                  |                                                      | Alpha-synuclein                |
|                                            | CD11c                                  |                                                      | ApoA-I                         |
|                                            | CD14                                   |                                                      | Calbindin                      |
|                                            | CD163                                  |                                                      | FUS                            |
|                                            | CD39                                   |                                                      | LRRK2                          |
|                                            | CD40                                   |                                                      | Park5                          |
| GeoMx Human NGS Cell Death Panel           | CD68                                   | GeoMx Human NGS Core                                 | Park7                          |
|                                            | HLA-DR                                 |                                                      | Phospho-Alpha-synuclein (S129) |
|                                            | Bcl-2                                  |                                                      | PINK1                          |
|                                            | EpCAM                                  |                                                      | Tyrosine Hydroxylase           |
|                                            | ER-alpha                               |                                                      | Beta-2-microglobulin           |
|                                            | Her2                                   |                                                      | CD31                           |
|                                            | MART1                                  |                                                      | CD45                           |
|                                            | NY-ESO-1                               |                                                      | GAPDH                          |
| GeoMx Human NGS Cell Death Panel           | PAN-CK                                 | GeoMx Human NGS Core                                 | Histone H3                     |
|                                            | PR                                     |                                                      | Ki-67                          |
|                                            | PTEN                                   |                                                      | Ms IgG1                        |
|                                            | SMA                                    |                                                      | Ms IgG2a                       |
|                                            | AKT (phospho S473)                     |                                                      | Rb IgG                         |
|                                            | GSK3 (phospho S9)                      |                                                      | S6                             |
|                                            | GSK3αβ (phospho S21/S9)                |                                                      |                                |
|                                            | INPP4B                                 |                                                      |                                |
| MET                                        |                                        |                                                      |                                |
| Pan-AKT                                    |                                        |                                                      |                                |
| PLCG1                                      |                                        |                                                      |                                |
| P-RAS-40 (phospho T246)                    |                                        |                                                      |                                |
| TUBERIN (phospho T1462)                    |                                        |                                                      |                                |

**Supplementary Table S4: A list of Mouse protein targets by module.**

| NGS Mouse Panel                            | Target                       | NGS Mouse Panel                                      | Target                         |
|--------------------------------------------|------------------------------|------------------------------------------------------|--------------------------------|
| GeoMx Mouse Immune Activation Status Panel | CD127                        | GeoMx Mouse NGS Alzheimer's Extended Pathology Panel | BACE1                          |
|                                            | CD27                         |                                                      | IDE                            |
|                                            | CD40L                        |                                                      | Neprilysin                     |
|                                            | CD44                         |                                                      | Neurogranin                    |
|                                            | CD86                         |                                                      | PSEN1                          |
|                                            | ICOS                         |                                                      | p-Tau (S199)                   |
|                                            | PD-1                         |                                                      | p-Tau (S396)                   |
|                                            | PD-L1                        |                                                      | p-Tau (T214)                   |
|                                            |                              |                                                      | p-Tau (T231)                   |
| GeoMx Mouse NGS Cell Death Panel           | BAD                          | GeoMx Mouse NGS Alzheimer's Pathology Panel          | Amyloid Precursor Protein      |
|                                            | BCLXL                        |                                                      | Amyloid-Beta 1-42              |
|                                            | BIM                          |                                                      | APOE                           |
|                                            | Cleaved Caspase 3 gamma-H2AX |                                                      | P2RX7                          |
|                                            | NF-1 (Neurofibromin-1)       |                                                      | Phospho-Tau (S404)             |
|                                            | p21                          |                                                      | Tau                            |
|                                            | p53                          |                                                      | Tdp-43                         |
|                                            | PARP                         |                                                      | Ubiquitin                      |
|                                            | Perforin                     |                                                      |                                |
| GeoMx Mouse NGS Immune Cell Typing Panel   | BatF3                        | GeoMx Mouse NGS Autophagy Panel                      | ATG12                          |
|                                            | CD19                         |                                                      | ATG5                           |
|                                            | CD28                         |                                                      | BAG3                           |
|                                            | CD3                          |                                                      | Beclin-1                       |
|                                            | CD34                         |                                                      | LC3B                           |
|                                            | CD4                          |                                                      | P62                            |
|                                            | CD8                          |                                                      | PLA2G6                         |
|                                            | Fibronectin                  |                                                      | TFEB                           |
|                                            | FOXP3                        |                                                      | ULK1                           |
|                                            | GZMB                         |                                                      | VPS35                          |
| GeoMx Mouse NGS IO Drug Target Panel       | B7-H3                        | GeoMx Mouse NGS Glial Cell Subtyping Panel           | Aldh111                        |
|                                            | CTLA4                        |                                                      | CD9                            |
|                                            | GITR                         |                                                      | CSF1R                          |
|                                            | LAG3                         |                                                      | Ctsd                           |
|                                            | OX40L                        |                                                      | GPNMB                          |
|                                            | Tim-3                        |                                                      | Mertk                          |
|                                            | VISTA                        |                                                      | MSR1                           |
|                                            |                              |                                                      | S100B                          |
|                                            |                              |                                                      | SPP1                           |
|                                            |                              |                                                      | VIM                            |
| GeoMx Mouse NGS MAPK Signaling Panel       | BRAF                         | GeoMx Mouse NGS Neural Cell Typing Panel             | GFAP                           |
|                                            | EGFR                         |                                                      | IBA1                           |
|                                            | JNK (phospho T183/Y185)      |                                                      | MAP2                           |
|                                            | MEK1                         |                                                      | Myelin basic protein           |
|                                            | MEK1 (phospho S217/S221)     |                                                      | NeuN                           |
|                                            | P38                          |                                                      | Neurofilament light            |
|                                            | p44/42 MAPK ERK1/2           |                                                      | Olig2                          |
| p44/42 MAPK ERK1/2 (phospho T202/Y204)     | Synaptophysin                |                                                      |                                |
| P90RSK (phospho T359/S363)                 | TMEM119                      |                                                      |                                |
|                                            | pan-RAS                      |                                                      | Alpha-synuclein                |
| GeoMx Mouse NGS Myeloid Panel              | CD11b                        | GeoMx Mouse NGS Parkinson's Pathology Panel          | ApoA-I                         |
|                                            | CD11c                        |                                                      | Calbindin                      |
|                                            | CD14                         |                                                      | LRRK2                          |
|                                            | CD163                        |                                                      | Park5                          |
|                                            | CD39                         |                                                      | Park7                          |
|                                            | CD40                         |                                                      | Phospho-Alpha-synuclein (S129) |
|                                            | CD68                         |                                                      | PINK1                          |
|                                            | F4/80                        |                                                      | Tyrosine Hydroxylase           |
|                                            | Ly6G/Ly6C                    |                                                      | CD31                           |
|                                            | MHC II                       |                                                      | CD45                           |
| GeoMx Mouse NGS Pan-Tumor Panel            | AhR                          | GeoMx Mouse NGS Core                                 | GAPDH                          |
|                                            | AR                           |                                                      | GFP                            |
|                                            | EpCAM                        |                                                      | Histone H3                     |
|                                            | ER-alpha                     |                                                      | Ki-67                          |
|                                            | Her2                         |                                                      | Rat IgG2a                      |
|                                            | IFNGR                        |                                                      | Rat IgG2b                      |
|                                            | PAN-CK                       |                                                      | Rb IgG                         |
|                                            | Pmel17                       |                                                      | S6                             |
|                                            | SMA                          |                                                      |                                |
|                                            |                              |                                                      |                                |
| GeoMx Mouse NGS PI3K/AKT Signaling Panel   | AKT (phospho S473)           |                                                      |                                |
|                                            | AMPK-alpha_pThr172           |                                                      |                                |
|                                            | GSK3αβ (phospho S21/S29)     |                                                      |                                |
|                                            | MET                          |                                                      |                                |
|                                            | Pan-AKT                      |                                                      |                                |
|                                            | PLCG1                        |                                                      |                                |
|                                            | P-RAS-40 (phospho T246)      |                                                      |                                |
| S6_pS235/236                               |                              |                                                      |                                |

**Supplementary Table S5:** The 11-cell pellet array (CPA) used in assay development.

|    | <b>Cell Line</b> | <b>Tissue</b>               | <b>Cell Sex</b> | <b>Source, RRID</b>                 |
|----|------------------|-----------------------------|-----------------|-------------------------------------|
| 1  | COLO201          | Large intestine             | Male            | (ATCC Cat# CCL-224, RRID:CVCL_F399) |
| 2  | DAUDI            | Haematopoietic and lymphoid | Male            | (ATCC Cat# CCL-213, RRID:CVCL_0008) |
| 3  | H596             | Lung                        | Male            | (ATCC Cat# HTB178, RRID:CVCL_1571)  |
| 4  | HDLM2            | Haematopoietic and lymphoid | Male            | (DSMZ Cat# ACC 17, RRID:CVCL_0009)  |
| 5  | HEL              | Haematopoietic and lymphoid | Male            | (ATCC Cat# TIB-180, RRID:CVCL_2481) |
| 6  | HS578T           | Breast                      | Female          | (ATCC Cat# HTB-126, RRID:CVCL_0332) |
| 7  | HUT78            | Haematopoietic and lymphoid | Male            | (ATCC Cat# TIB161, RRID:CVCL_0337)  |
| 8  | MALME3M          | Skin                        | Male            | (ATCC Cat# HTB-64, RRID:CVCL_1438)  |
| 9  | OPM2             | Haematopoietic and lymphoid | Female          | (DSMZ Cat# ACC 50, RRID:CVCL_1625)  |
| 10 | THP1             | Haematopoietic and lymphoid | Male            | (ATCC Cat# TIB-202, RRID:CVCL_0006) |
| 11 | U118MG           | Brain                       | Male            | (ATCC Cat# HTB-15, RRID:CVCL_0633)  |

**Supplementary Table S6: The 45-cell pellet array (CPA) used in assay development.**

| CP# | Cell Line    | Tissue Origin               | GENE, Accession    | Treatment                                         | Cell Sex | Source, RRID                                |
|-----|--------------|-----------------------------|--------------------|---------------------------------------------------|----------|---------------------------------------------|
| 1   | HEK293 Tim3  | Kidney                      | TIM3, NM_032782.4  |                                                   | Female   | (Crown Bio Cat# C2021)                      |
| 2   | HEK293 4-1BB | Kidney                      | CD137, NM_001561.5 |                                                   | Female   | (Crown Bio Cat# C2012)                      |
| 3   | HEK293 PDL1  | Kidney                      | CD274, NM_014143   |                                                   | Female   | (Crown Bio Cat# C2011)                      |
| 4   | HEK293 PDL2  | Kidney                      | PDL2, NM_025239.3  | Stable over-expressor in HEK293T (RRID:CVCL_0045) | Female   | (Crown Bio Cat# C2025)                      |
| 5   | HEK293 Lag3  | Kidney                      | LAG3, NM_002286.5  |                                                   | Female   | (Crown Bio Cat# C2020)                      |
| 6   | HEK293 GITR  | Kidney                      | GITR, NM_009400.2  |                                                   | Female   | (Crown Bio Cat# C2011)                      |
| 7   | HEK293 CTLA4 | Kidney                      | CTLA4, NM_005214.4 |                                                   | Female   | (Crown Bio Cat# C2015)                      |
| 8   | HEK293 PD1   | Kidney                      | PDCD1, NM_005018   |                                                   | Female   | (Crown Bio Cat# C2004)                      |
| 9   | HEK293 ICOS  | Kidney                      | ICOS, NM_012092.3  |                                                   | Female   | (Crown Bio Cat# C2016)                      |
| 10  | A431         | Skin                        |                    |                                                   | Female   | (ATCC Cat# CRL1555, RRID:CVCL_0037)         |
| 11  | CCRF-CEM     | Peripheral blood            |                    |                                                   | Female   | (ATCC Cat# CCL-119, RRID:CVCL_0207)         |
| 12  | 22rv1        | Prostate                    |                    |                                                   | Male     | (ATCC Cat# CRL2505, RRID:CVCL_1045)         |
| 13  | H596         | Lung                        |                    |                                                   | Male     | (ATCC Cat# HTB178, RRID:CVCL_1571)          |
| 14  | HCC78        | Lung                        |                    |                                                   | Male     | (DSMZ Cat# ACC 563, RRID:CVCL_2061)         |
| 15  | HCT 116      | Large intestine             |                    |                                                   | Male     | (ATCC Cat# CCL-247, RRID:CVCL_0291)         |
| 16  | HL-60        | Peripheral blood            |                    |                                                   | Female   | (ATCC Cat# CCL-240, RRID:CVCL_0002)         |
| 17  | HUH7         | Haematopoietic and Lymphoid |                    |                                                   | Male     | (ECACC Sigma Cat# 01042712, RRID:CVCL_0336) |
| 18  | Hut78        | Haematopoietic and Lymphoid |                    |                                                   | Male     | (ATCC Cat# TIB161, RRID:CVCL_0337)          |
| 19  | MDA-MB-468   | Breast                      |                    |                                                   | Female   | (ATCC Cat# HTB-132, RRID:CVCL_0419)         |
| 20  | K-562        | Haematopoietic and Lymphoid |                    |                                                   | Female   | (ATCC Cat# CCL-243, RRID:CVCL_0004)         |
| 21  | OVCAR8       | Ovary                       |                    |                                                   | Female   | (ATCC Cat# HTB-161, RRID:CVCL_1629)         |
| 22  | Raji         | Haematopoietic and Lymphoid |                    |                                                   | Male     | (ATCC Cat# CCL-86, RRID:CVCL_0511)          |
| 23  | Ri-1         | Haematopoietic and Lymphoid |                    |                                                   | Female   | (DSMZ Cat# ACC 585, RRID:CVCL_1885)         |
| 24  | SU-DHL-6     | B-cell Lymphoma             |                    |                                                   | Male     | (ATCC Cat# CRL-2959, RRID:CVCL_2206)        |
| 25  | RPMI-8226    | Haematopoietic and Lymphoid |                    |                                                   | Male     | (ATCC Cat# CCL-155, RRID:CVCL_0014)         |
| 26  | RAMOS        | Haematopoietic and Lymphoid |                    |                                                   | Male     | (ATCC Cat# CRL-1923, RRID:CVCL_0597)        |
| 27  | SK-BR-3      | Breast                      |                    |                                                   | Female   | (ATCC Cat# HTB-30, RRID:CVCL_0033)          |
| 28  | SK-MEL-5     | Skin                        |                    |                                                   | Female   | (ATCC Cat# HTB-70, RRID:CVCL_0527)          |
| 29  | SU-DHL-1     | Haematopoietic and Lymphoid |                    |                                                   | Male     | (ATCC Cat# CRI-2955, RRID:CVCL_0538)        |
| 30  | SU-DHL-4     | B-cell Lymphoma             |                    |                                                   | Male     | (ATCC Cat# CRI-2957, RRID:CVCL_0539)        |
| 31  | SK-MEL-2     | Skin                        |                    |                                                   | Male     | (ATCC Cat# HTB-68, RRID:CVCL_0069)          |
| 32  | WSU-NHL      | Haematopoietic and Lymphoid |                    |                                                   | Female   | (DSMZ Cat# ACC 58, RRID:CVCL_1793)          |
| 33  | THP-1        | Peripheral blood            |                    |                                                   | Male     | (ATCC Cat# TIB-202, RRID:CVCL_0006)         |
| 34  | SUP-B15      | Haematopoietic and Lymphoid |                    |                                                   | Male     | (ATCC Cat# CRL-1929, RRID:CVCL_0103)        |
| 35  | U87-MG       | Brain                       |                    |                                                   | Male     | (ATCC Cat# HTB-14, RRID:CVCL_0022)          |
| 36  | U251-MG      | Brain                       |                    |                                                   | Male     | (ECACC Sigma Cat# 09063001, RRID:CVCL_0021) |
| 37  | NB4          | Haematopoietic and Lymphoid |                    |                                                   | Female   | (DSMZ Cat# ACC 207, RRID:CVCL_0005)         |
| 38  | BT-474       | Breast                      |                    |                                                   | Female   | (ATCC Cat# HTB-20, RRID:CVCL_0179)          |
| 39  | NK-92        | Peripheral blood            |                    |                                                   | Male     | (DSMZ Cat# ACC-488, RRID:CVCL_2142)         |
| 40  | SW48         | Large intestine             |                    |                                                   | Female   | (ATCC Cat# CCL-231, RRID:CVCL_1724)         |
| 41  | DBTRG-05MG   | Brain                       |                    |                                                   | Female   | (ATCC Cat# CRL-2020, RRID:CVCL_1169)        |
| 42  | NCI-H2228    | Lung                        |                    |                                                   | Female   | (ATCC Cat# CRI-5935, RRID:CVCL_1543)        |
| 43  | A431 CA      | Skin                        |                    | Calyculin A (TOCRIS Cat #. 1336, 100 nM, 30 min)  | Female   | (ATCC Cat# CRL1555, RRID:CVCL_0037)         |
| 44  | SH-SY5Y CA   | Brain                       |                    |                                                   | Female   | (DSMZ Cat# ACC 209, RRID:CVCL_0019)         |
| 45  | SKBR3 PI     | Breast                      |                    |                                                   | Female   | (ATCC Cat# HTB-30, RRID:CVCL_0033)          |
