# Supplementary material for: Ultra High-plex Spatial Proteogenomic Investigation of Giant Cell Glioblastoma Multiforme Immune Infiltrates Reveals Distinct Protein and RNA Expression Profiles
Source: PubMed Central journal article supplement (PMC10155752; doi:10.1158/2767-9764.crc-22-0396), 2023-05-03
Supplement: crc-22-0396-s04.pdf [file crc-22-0396-s04.pdf]

Supplementary Figure S16

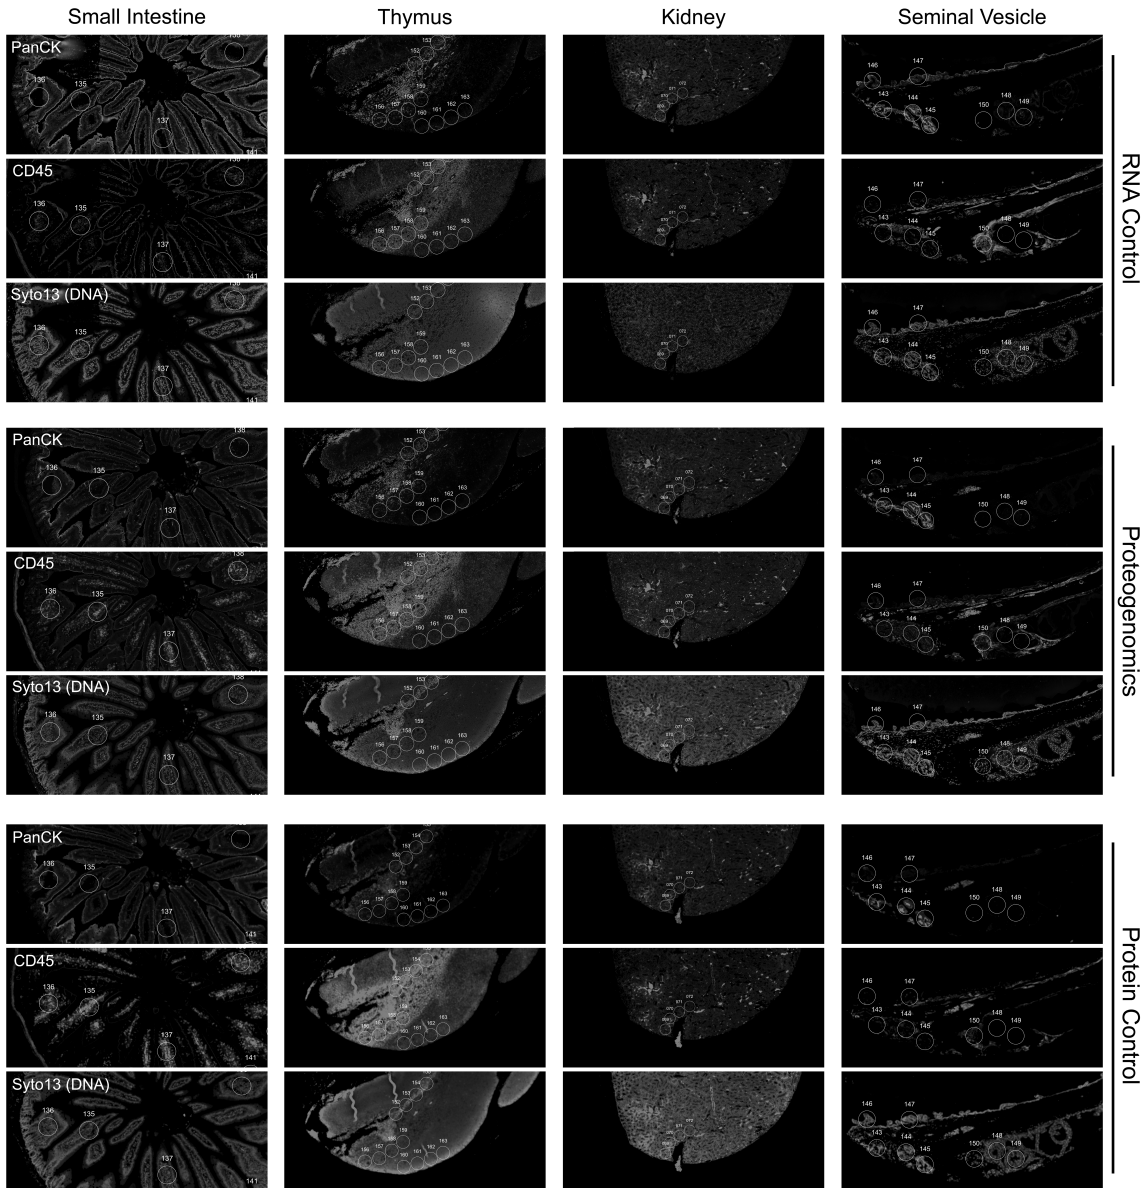

**Supplementary Figure S16: Representative grey scale images of used in the assessment of spatial proteogenomic data quality across mouse tissue types.** FFPE sections were stained with the GeoMx NGS Mouse Protein modules (137-plex), GeoMx Mm WTA, and antibodies against CD45 (Immune), PanCK (Tumor) and Syto13 (nuclear, DNA).

## Supplementary Figure S17

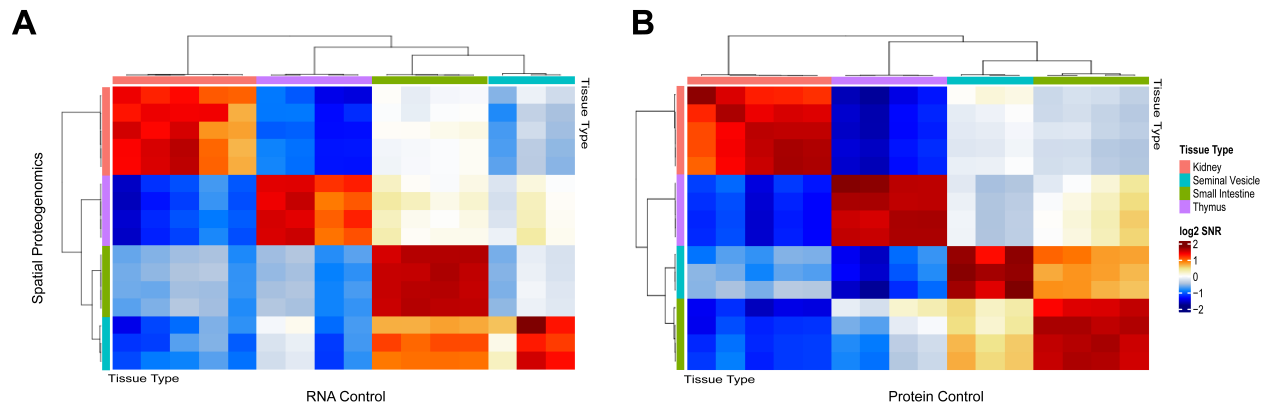

**Supplementary Figure S17: ROI-to-ROI comparison of the proteogenomic data to the single analyte controls.** Mouse FFPE sections were stained with 137-plex GeoMx NGS Mouse Protein modules and GeoMx Mm WTA. The Pearson's *R* was calculated between each ROI from the proteogenomic assay against all ROIs in the single analyte **(A)** RNA and **(B)** protein controls. Protein targets with  $SNR \geq 3$  and RNA targets with  $SNR \geq 4$  were used in the analysis.

Supplementary Figure S18

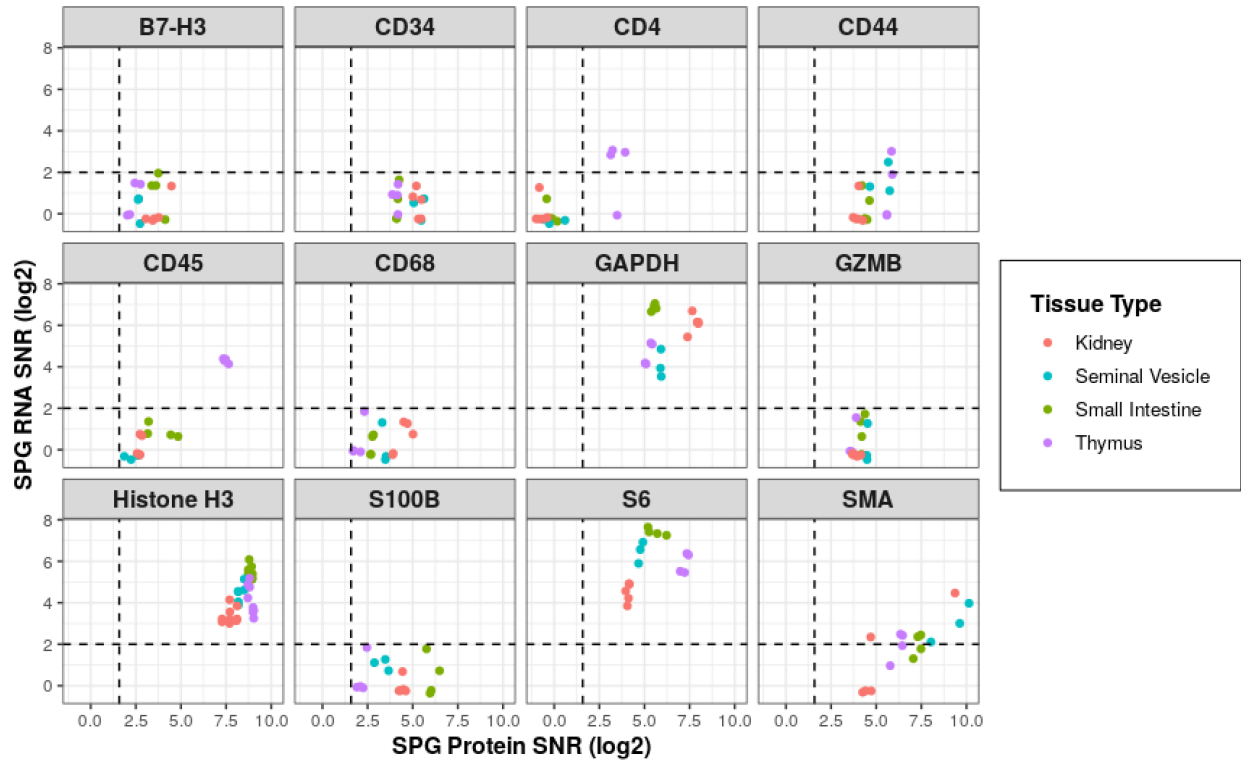

Supplementary Figure S18: Expression levels of select matching RNA and protein targets in several mouse tissue types. For protein targets with SNR  $\geq 3$  and the respective RNA target with SNR  $\geq 4$ , a pairwise scatter plot was generated to visualize the concordance between respective analytes.
