# Supplementary material for: Ultra High-plex Spatial Proteogenomic Investigation of Giant Cell Glioblastoma Multiforme Immune Infiltrates Reveals Distinct Protein and RNA Expression Profiles
Source: PubMed Central journal article supplement (PMC10155752; doi:10.1158/2767-9764.crc-22-0396), 2023-05-03
Supplement: crc-22-0396-s05.pdf [file crc-22-0396-s05.pdf]

## Supplementary Figure S19

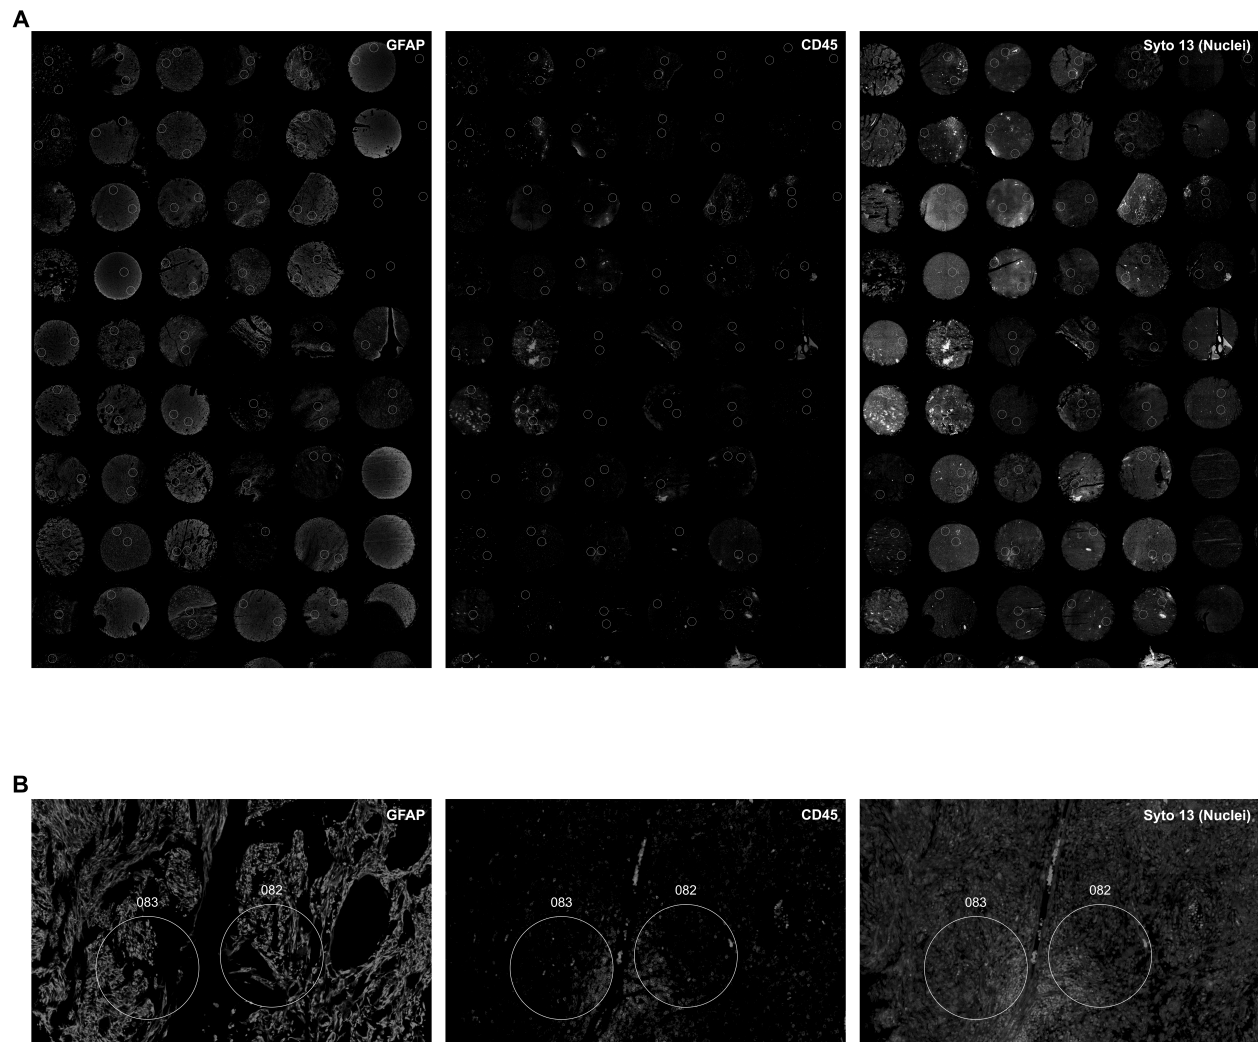

**Supplementary Figure S19: Representative images used in the assessment of spatial proteogenomic data quality on Glioblastoma multiforme Grade 4.** (A) Human brain glioblastoma tissue array was stained with the GeoMx NGS Human Protein modules (147-plex), WTA, and antibodies against GFAP (Astrocyte/Tumor; left panel), CD45 (Immune; middle panel) and Syto13 (Nuclei; right panel). (B) ROI were segmented into GFAP<sup>+</sup> (left panel), CD45<sup>+</sup> (middle panel) or Syto13 (right panel).

**Supplementary Figure S20**

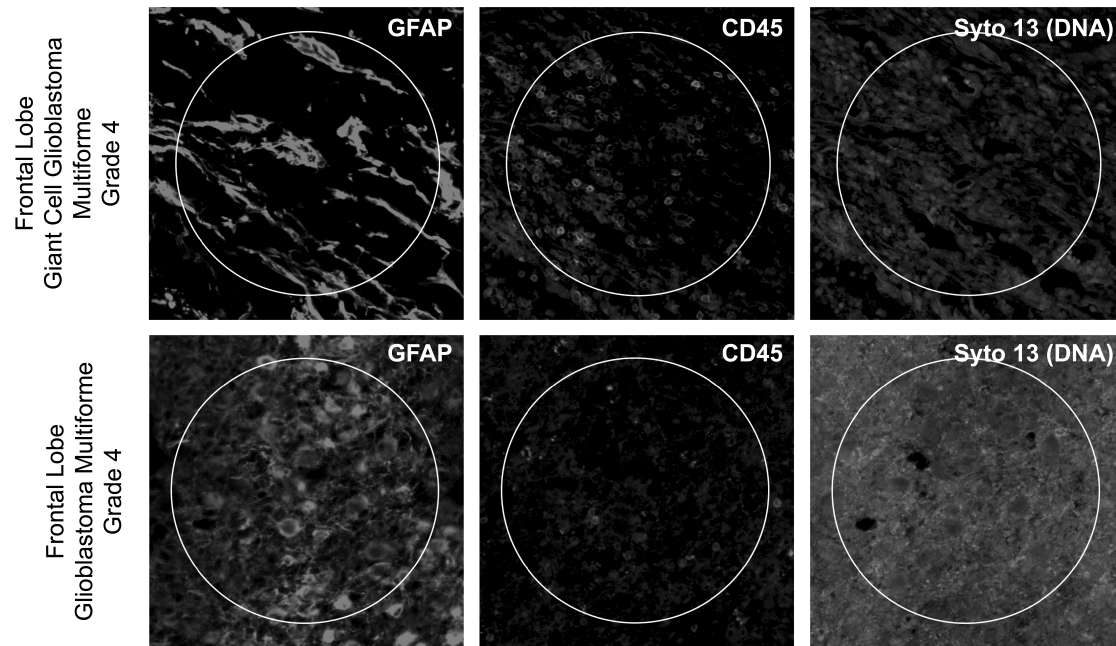

**Supplementary Figure S20: Representative images used in the assessment of spatial proteogenomic data quality on gcGBM and GBM. ROIs for gcGBM (top panel) and GBM (bottom panel) were segmented into GFAP<sup>+</sup> (Astrocyte/Tumor; left panel), CD45<sup>+</sup> (Immune; middle panel) and Syto13 (Nuclear, DNA; right panel).**



Supplementary Figure S22

A

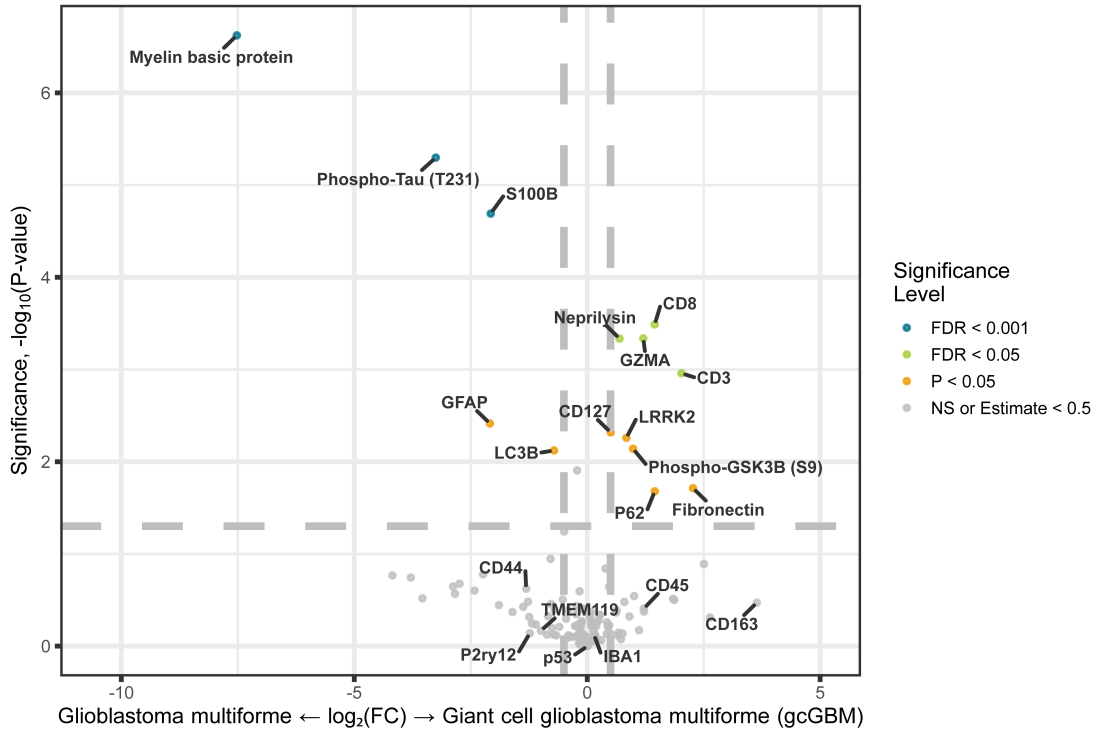

B

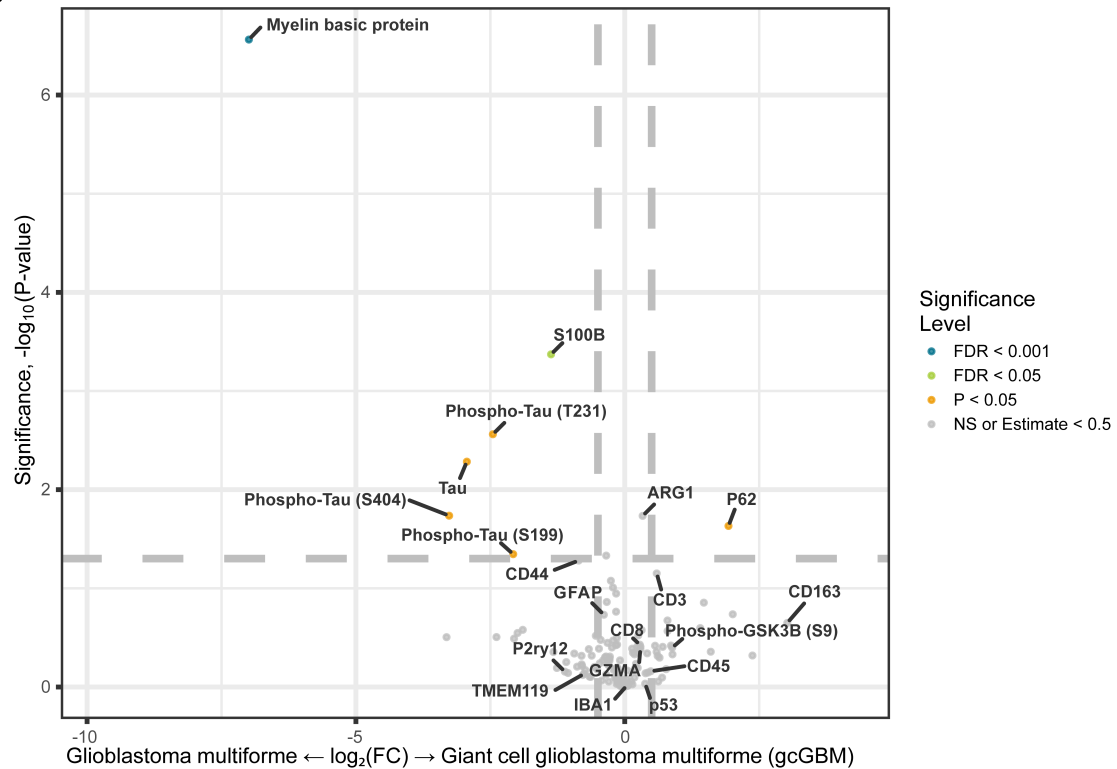

**Supplementary Figure S22: Differential protein expression analysis between GBM and gcGBM.** Volcano showing the differential protein expression profiles for (A) CD45- and (B) GFAP-enriched segments within the left frontal lobe. Proteins with significantly differential expression are highlighted either orange ( $P$ -value < 0.05), green (FDR < 0.05) or blue (FDR < 0.001), whereas proteins in grey show no significant difference in expression. A subset of differentially expressed proteins are labeled.
