# Supplementary material for: Ultra High-plex Spatial Proteogenomic Investigation of Giant Cell Glioblastoma Multiforme Immune Infiltrates Reveals Distinct Protein and RNA Expression Profiles
Source: PubMed Central journal article supplement (PMC10155752; doi:10.1158/2767-9764.crc-22-0396), 2023-05-03
Supplement: crc-22-0396-s06.pdf [file crc-22-0396-s06.pdf]

## Supplementary Methods

### Supplementary Methods S1

#### Quick Guide: Spatial Proteogenomic Assay

Please refer to the GeoMx DSP Spatial Proteogenomic Protocol Manual (MAN-10158) for detailed instructions.

#### Day 1:

1. Bake slides @ 60°C for 30 min to 3 hours then cool to room temp.
2. Set up the Leica BOND RX/RX<sup>m</sup>.
  - a. Fill reagent containers and add them to the BOND Research Detection System:
    - i. **1X BOND WASH:** 30 mL into Home Buffer Open Container
    - ii. **Proteinase K:** 0.1 µg/mL in 1X PBS (see Table 1); 500 µL per slide plus 500 µL dead volume in BOND Titration Container.
  - b. Load the BOND Research Detection System.
  - c. From Slide Setup, select **Add Study**. Enter study information as shown below:
    - i. **Dispense volume:** 150 µL
    - ii. **Preparation protocol:** Bake and Dewax
    - iii. Select Ok
  - d. Select **Add Slide**. Enter study information as shown below:
    - i. **Tissue type:** Test tissue
    - ii. **Dispense volume:** 150 µL
    - iii. **Staining mode:** Single and Routine
    - iv. **Process:** IHC
    - v. **Marker:** \*Negative
    - vi. **Staining:** Proteogenomic slide prep for Staining
    - vii. **Preparation:** \*Bake and Dewax
    - viii. **HIER:** Select appropriate incubation time and temp based on the tissue type (**Table 1**)
    - ix. **Enzyme:** Select appropriate incubation time based on the tissue type (**Table 2**)
  - e. Print and attach labels to the slides.
  - f. Load slides with cover tiles into the slide tray.
  - g. Load and run your slides.

**Table 1:** Target Retrieval times and temps by tissue type

| Tissue Type    | Target Retrieval              |
|----------------|-------------------------------|
| Breast         | *HIER 10 min with ER2 @ 100°C |
| Cell pellets   | *HIER 10 min with ER2 @ 85°C  |
| Colorectal     | *HIER 20 min with ER2 @ 100°C |
| Melanoma       | *HIER 20 min with ER2 @ 100°C |
| Mouse tissue   | *HIER 10 min with ER2 @ 100°C |
| NSCLC          | *HIER 20 min with ER2 @ 100°C |
| Prostate tumor | *HIER 20 min with ER2 @ 100°C |
| Tonsil         | *HIER 20 min with ER2 @ 100°C |

**Table 2:** Proteinase K digest concentration and times by tissue type

| Tissue Type    | Proteinase K Digest  |
|----------------|----------------------|
| Breast         | 0.1 µg/mL for 15 min |
| Cell pellets   | 0.1 µg/mL for 5 min  |
| Colorectal     | 0.1 µg/mL for 15 min |
| Melanoma       | 0.1 µg/mL for 15 min |
| Mouse tissue   | 0.1 µg/mL for 15 min |
| NSCLC          | 0.1 µg/mL for 15 min |
| Prostate tumor | 0.1 µg/mL for 15 min |
| Tonsil         | 0.1 µg/mL for 15 min |

3. When the run has completed, remove the cover tiles and place slides in 1X PBS.
4. In Situ Hybridization (Overnight)
  - a. Clean hybridization chamber with RNase Away and prepare chamber with damp Kimwipes.
  - b. Warm Buffer R to room temp before opening.
  - c. Thaw RNA detection probes on ice. Before use, mix thoroughly by pipetting.
  - d. Make hybridization solution following Table 3 (n = number of slides).

**Table 3:** Hybridization solution equation

| Panel Configuration    | Buffer R   | RNA Probe Mix | Custom spike-in | Custom spike-in | DEPC-treated water | Final Volume |
|------------------------|------------|---------------|-----------------|-----------------|--------------------|--------------|
| Atlas (WTA, CTA) alone | 200 µL x n | 25 µL x n     | n/a             | n/a             | 25 µL x n          | 250 µL x n   |
| 1 custom spike-in      | 200 µL x n | 25 µL x n     | 12.5 µL x n     | n/a             | 12.5 µL x n        | 250 µL x n   |
| 2 custom spike-ins     | 200 µL x n | 25 µL x n     | 12.5 µL x n     | 12.5 µL x n     | n/a                | 250 µL x n   |

- e. Handling one slide at a time, wipe excess PBS and place in hyb chamber.
- f. Add 200 µL hyb solution and gently apply a Hybrislip coverslip, avoiding air bubbles.
- g. Repeat for all slides.
- h. Place hyb chamber in the over to hybridize overnight at 37°C.

## Day 2:

1. Perform stringent washes (1 hour)
  - a. Warm 100% formamide to room temp before opening.
  - b. Staining jars should be cleaned with RNase AWAY before use.
  - c. Make Stringent Wash by mixing equal parts 100% formamide and 4X SSC.
  - d. Fill two staining jars with Stringent Wash and preheat them to 37°C in water bath.
  - e. Dip slides in 2X SSC allowing coverslip to slide off.
  - f. Wash two times in Stringent Wash Solution for 25 min each at 37°C.
  - g. Wash two times in 2X SSC for 5 min each at room temp.

2. Primary antibody incubation (Overnight)
  - a. Wash one time in 1X TBS-T for 5 min at room temp.
  - b. Handling one slide at a time, remove excess buffer, draw a closed barrier with a hydrophobic pen and place in humidity chamber.
  - c. Block by applying 200  $\mu\text{L}$  Buffer W to each of the slides. Incubate at room temp for 1 hr in a closed humidity chamber.
  - d. Thaw Ab mix on ice and protected from light.
  - e. Make working antibody solution (see Table 4).

**Table 4:** Reagent volumes for Working Antibody Solution

| Core Ab Mix           | Module 1 Ab Mix       | Module 2 Ab Mix       | Each addl. Module Ab Mix | Morphology Marker 1     | Morphology Marker 2     | Each addl. Morphology Marker | Buffer W                         | Total Volume            |
|-----------------------|-----------------------|-----------------------|--------------------------|-------------------------|-------------------------|------------------------------|----------------------------------|-------------------------|
| 8 $\mu\text{L}$ x $n$ | 8 $\mu\text{L}$ x $n$ | 8 $\mu\text{L}$ x $n$ | 8 $\mu\text{L}$ x $n$    | 5.5 $\mu\text{L}$ x $n$ | 5.5 $\mu\text{L}$ x $n$ | 5.5 $\mu\text{L}$ x $n$      | (up to 200 $\mu\text{L}$ ) x $n$ | 200 $\mu\text{L}$ x $n$ |

- f. Cover tissue with 200  $\mu\text{L}$  working antibody solution.
- g. Incubate overnight in closed humidity chamber at 4°C protected from light.

### Day 3:

1. Post-Fix (1.75 hours)
  - a. Wash three times for 10 min each in 1X TBS-T.
  - b. Carefully tap each slide on a fresh Kimwipe to remove excess solution.
  - c. Cover tissue with 200  $\mu\text{L}$  4% PFA and incubate 30 min at room temp in a closed humidity chamber.
  - d. Wash two times for 5 min each in 1X TBST.
  - e. Dilute SYTO 13 1:10 using 1X TBS.
  - f. Cover tissue with 200  $\mu\text{L}$  of diluted SYTO 13 and incubate 15 min at room temp in closed humidity chamber.
  - g. Wash slide in 1X TBS-T.
  - h. Scrape off hydrophobic pen and store slides in 1X TBS-T.
2. Load slides and operate the GeoMx DSP instrument for aspirate collection according to the GeoMx-NGS DSP Instrument manual (MAN-10152).

### Day 4:

1. NGS Library Preparation
  - a. After the GeoMx run is complete, proceed to NGS library preparation as described in the GeoMx DSP NGS Readout User Manual (MAN-10153).
  - b. Follow the steps of conventional (single analyte) GeoMx NGS Library Preparation, noting this specific instruction for the Proteogenomic assay protocol:
    - i. In the first step of the NGS Library Prep, the aspirates in the collection plate are dried down and then rehydrated. **Rehydrate proteogenomic assay samples in 10  $\mu\text{L}$  of DEPC-treated water.**
  - c. Remaining library preparation, purification and sequence loading steps should be followed as written in the GeoMx DSP NGS Readout Manual.
  - d. A sequencing depth of 650 reads per  $\mu\text{m}^2$  of collection area is recommended.
